# Supplementary material for: Two-dimensional InTeClO3: an ultrawide-bandgap material with potential application in a deep ultraviolet photodetector
Source: Royal Society of Chemistry journal article supplement (doi:10.1039/d3cp03612j), 2023-01-01
Supplement: d3cp03612j1.pdf [file d3cp03612j1.pdf]

*Electronic supplementary information for*

**Two-dimensional  $\text{InTeClO}_3$ : an ultrawide-bandgap material with potential application in deep ultraviolet photodetector**

Meiyang Yu,<sup>a</sup> Fumin Zhang,<sup>a</sup> Wenjiang Gao,<sup>a</sup> Huimin Shen,<sup>a</sup> Lili Kang,<sup>\*a</sup> Lin Ju,<sup>\*b</sup> and Huabing Yin<sup>\*a</sup>

<sup>a</sup> Joint Center for Theoretical Physics, Institute for Computational Materials Science, and International Joint Research Laboratory of New Energy Materials and Devices of Henan Province, School of Physics and Electronics, Henan University, Kaifeng 475004, China.

<sup>b</sup> School of Physics and Electric Engineering, Anyang Normal University, Anyang 455000, China

\*E-mails: [llkang@henu.edu.cn](mailto:llkang@henu.edu.cn) (Lili Kang); [julin@aynu.edu.cn](mailto:julin@aynu.edu.cn) (Lin Ju); [yhb@henu.edu.cn](mailto:yhb@henu.edu.cn) (Huabing Yin)

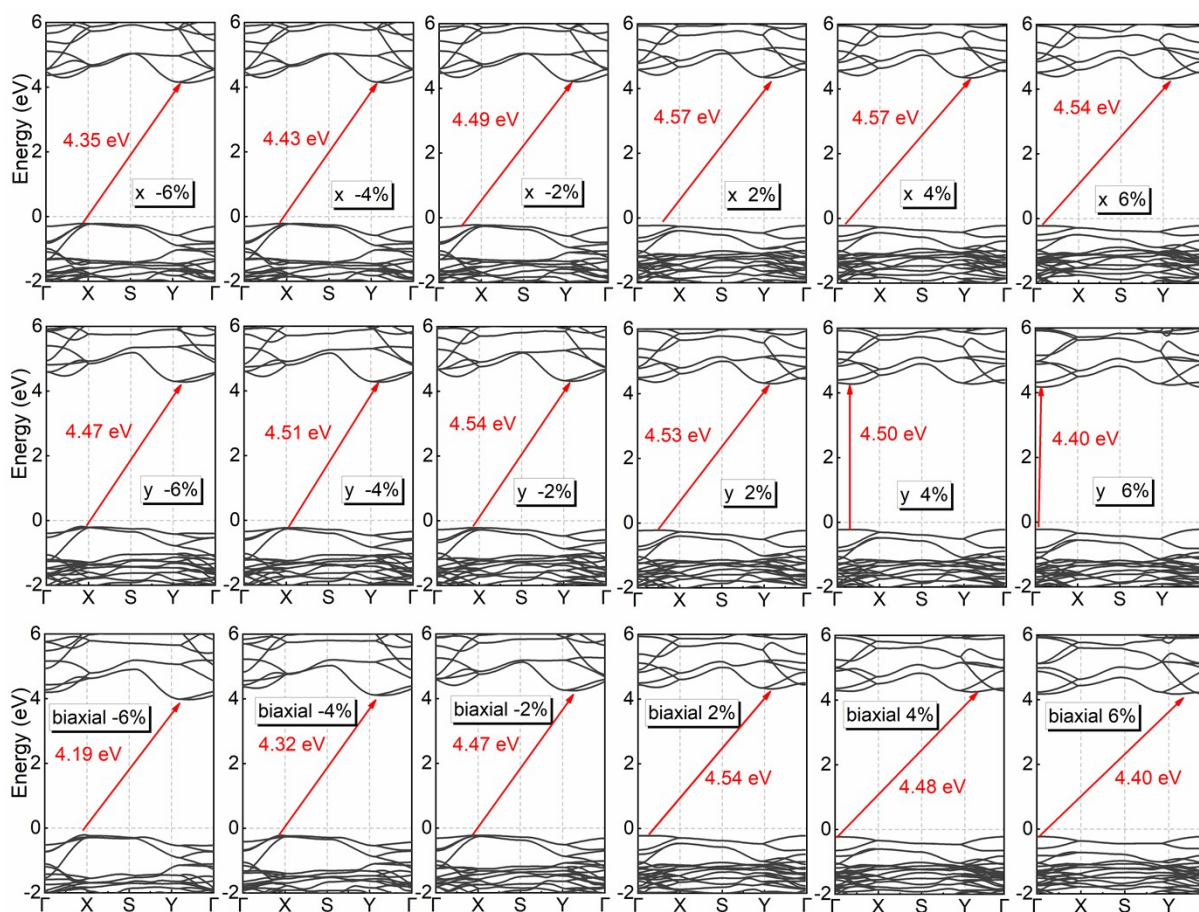

**Fig. S1.** The band structures of the  $\text{InTeClO}_3$  monolayer under in-plane strain from  $-6\%$  to  $6\%$  along the uniaxial and biaxial directions, respectively. The bandgap is highlighted in red. Fermi level is set to zero.

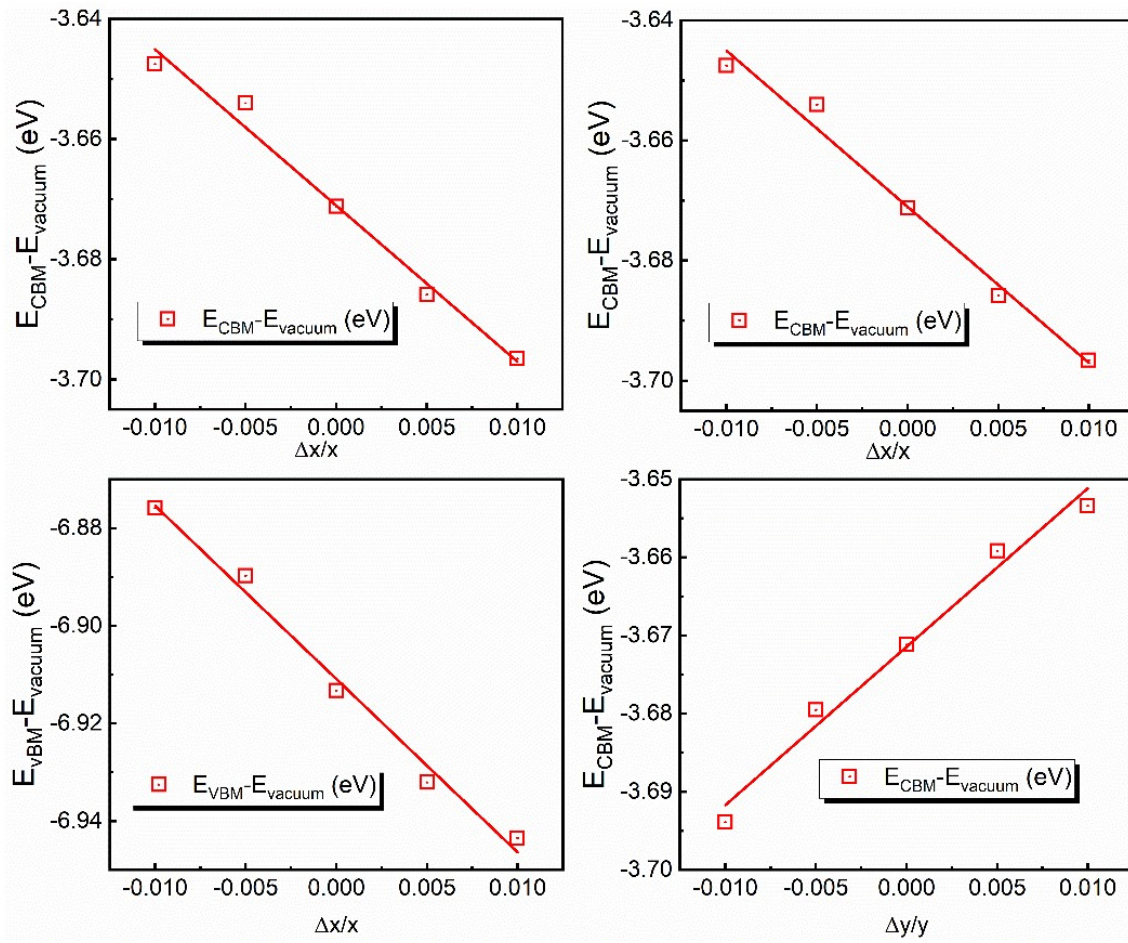

**Fig. S2.** Evaluations of band edges of monolayer InTeClO<sub>3</sub> relative to vacuum with respect to strains along the  $x$  and  $y$  directions, respectively. The slope is the deformation potential  $E_d$ .
